# Supplementary material for: Enantioselective Self-Assembled Nanofibrillar Network with Glutamide-Based Organogelator
Source: MDPI journal article supplement (doi:10.3390/nano11061376), 2021-05-23
Supplement: s1 [file s1]

## Supplementary Materials

# Enantioselective Self-assembled Nanofibrillar Network with Glutamide-based Organogelator

Nao Nagatomo<sup>1</sup>, Hisashi Oishi<sup>1</sup>, Yutaka Kuwahara<sup>1</sup>, Makoto Takafuji<sup>1,\*</sup>, Reiko Oda<sup>2</sup>, Taisuke Hamada<sup>3</sup>, and Hirotaka Ihara<sup>1,3,\*</sup>

<sup>1</sup> Department of Applied Chemistry and Biochemistry, Kumamoto University, 2-39-1 Kurokami, Chuo-ku, Kumamoto 860-8555, Japan

<sup>2</sup> Institut de Chimie & Biologie des Membranes & des Nano-objects, CNRS, Pessac 33607, France

<sup>3</sup> National Institute of Technology, Okinawa College, 905 Henoko, Nago, Okinawa 905-2192, Japan

\* Correspondence: ihara@kumamoto-u.ac.jp; Tel.: +81-96-342-3662

## Supplementary figures

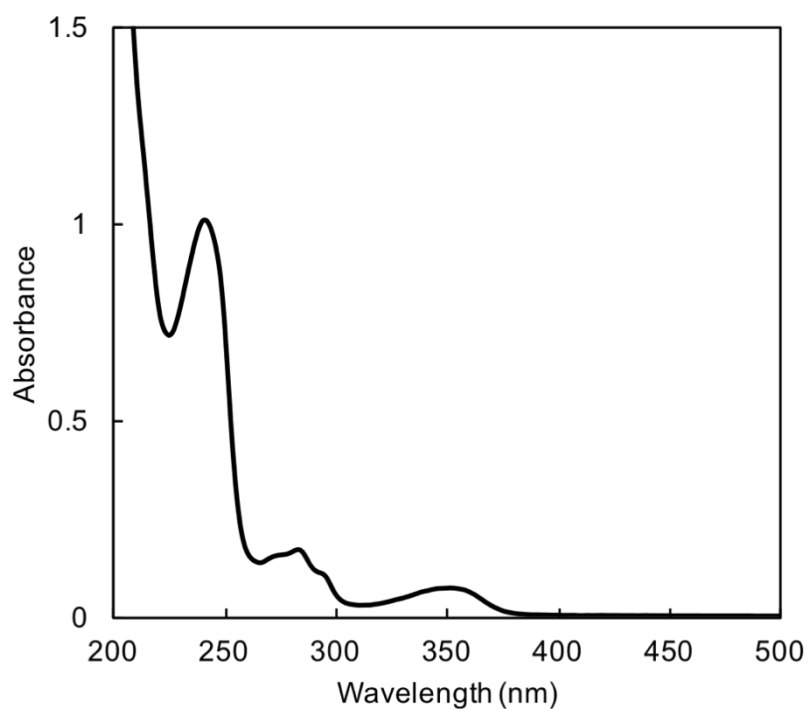

**Figure S1.** UV-visible spectrum of R-BD in 95:5 (v/v) methylcyclohexane:THF. Concentration: 0.05 mM. Temperature: 0 °C.

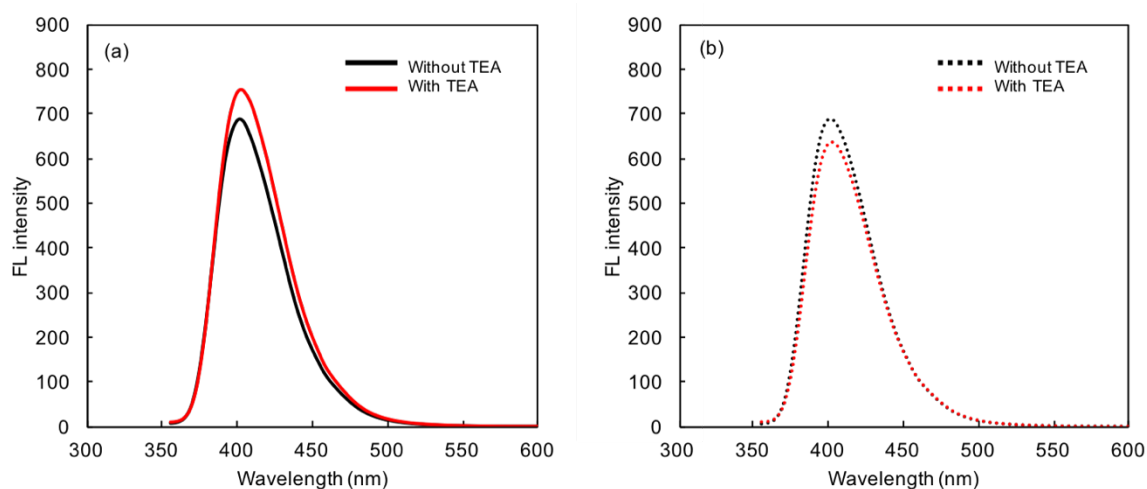

**Figure S2.** Fluorescence spectra of (a) R-BD and (b) S-BD in 95:5 (v/v) methylcyclohexane:THF containing G-CA. Concentrations: G-CA, 0.75 mM; BD, 0.05 mM; TEA, 0.5 mM. Temperature: 0 °C. Excitation: 350 nm.
